# Supplementary material
Source: publisher site journal article supplement (https://www.kjim.org/upload/media/kjim-2022-084_suppl2.pdf)
Supplement: Supplementary file 1 [file kjim-2022-084_suppl2.pdf]

**Supplementary Table 2. Definitions of vital signs and laboratory/radiologic data before and after secondary infection**

| Variable                       | Definition                                                                                                                                                               |
|--------------------------------|--------------------------------------------------------------------------------------------------------------------------------------------------------------------------|
| Pre MBP                        | The lowest mean BP among mean BPs within 1 day before infection confirmation                                                                                             |
| Pre HR                         | The highest HR among HR within 1 day before infection confirmation                                                                                                       |
| Pre RR                         | The fastest RR within 1 day before infection confirmation                                                                                                                |
| Pre BT                         | The highest BT among BT within 1 day before infection confirmation                                                                                                       |
| Pre O <sub>2</sub> need        | The highest FiO <sub>2</sub> within 1 day before infection confirmation                                                                                                  |
| Pre WBC                        | The highest WBC performed closer to the prior date of confirmation of infection                                                                                          |
| Pre CRP                        | The highest CRP performed closer to the prior date of confirmation of infection                                                                                          |
| Pre procalcitonin              | The highest procalcitonin performed closer to the prior date of confirmation of infection                                                                                |
| Post MBP                       | The lowest mean BP among mean BPs within 1 day after infection confirmation                                                                                              |
| Post HR                        | The highest HR among HR within 1 day after infection confirmation                                                                                                        |
| Post RR                        | The fastest RR within 1 day after infection confirmation                                                                                                                 |
| Post BT                        | The highest BT among BT within 1 day after infection confirmation                                                                                                        |
| Post O <sub>2</sub> need       | The highest FiO <sub>2</sub> within 1 day after infection confirmation                                                                                                   |
| Post WBC                       | The highest WBC performed closer to the date after infection was confirmed.                                                                                              |
| Post CRP                       | The highest CRP performed closer to the date after infection was confirmed.                                                                                              |
| Post procalcitonin             | The highest procalcitonin performed closer to the date after infection was confirmed.                                                                                    |
| Chest X-ray                    |                                                                                                                                                                          |
| Deterioration of GGO           | In case of GGO aggravation on the CXR before and after the date of infection, the radiologist and/or pulmonologist confirmed GGO aggravation of CXR.                     |
| Deterioration of consolidation | In case of consolidation aggravation on the CXR before and after the date of infection, the radiologist and/or pulmonologist confirmed consolidation aggravation of CXR. |
| Deterioration of chest X-ray   | In case of any type of aggravation on the CXR before and after the date of infection, the radiologist and/or pulmonologist confirmed deterioration of CXR.               |

MBP, mean blood pressure; BP, blood pressure; HR, heart rate; RR, respiratory rate; BT, body temperature; FiO<sub>2</sub>, fraction of inspired oxygen; WBC, white blood cell; CRP, C-reactive protein; GGO, ground glass opacity; CXR, chest X-ray.
